# Supplementary material
Source: bioRxiv or medRxiv preprint supplement (https://medrxiv.org/highwire/filestream/93735/field_highwire_adjunct_files/1/2020.08.18.20176743-2.pdf)
Supplement: Supplementary file [file 2020.08.18.20176743-2.pdf]

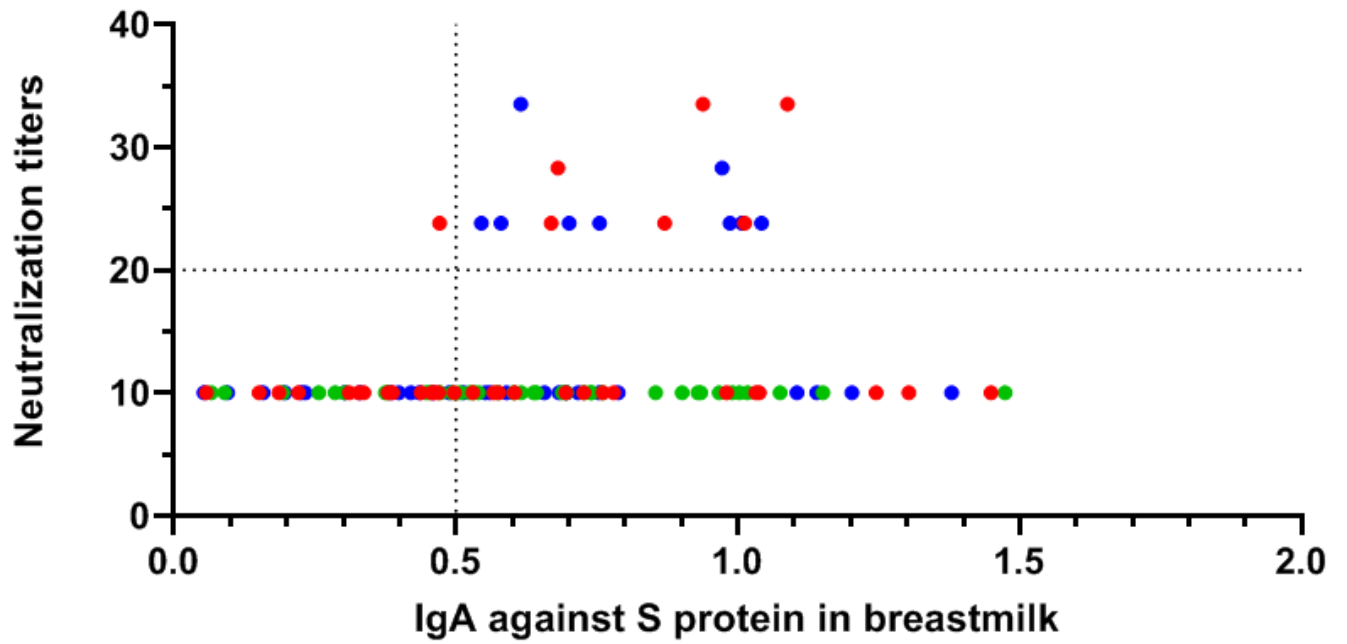

Supplemental eFigure 2. Association between IgA levels in breastmilk targeting S protein of SARS-CoV-2 measured by ELISA, and neutralization titers of breastmilk against clinical isolate SARS-CoV-2 virus.

Red dots, blue dots and greens dots represent unpasteurized (UP), High Pressure Pasteurized (HPP) and Holder Pasteurized (HoP) breastmilk respectively.
